# Supplementary material for: Low-Dimensional Compounds Containing Bioactive Ligands. Part XX: Crystal Structures, Cytotoxic, Antimicrobial Activities and DNA/BSA Binding of Oligonuclear Zinc Complexes with Halogen Derivatives of 8-Hydroxyquinoline
Source: MDPI journal article supplement (doi:10.3390/inorganics11020060), 2023-01-26
Supplement: s1 [file s1]

# Supplementary Materials: Low-Dimensional Compounds Containing Bioactive Ligands. Part XX: Crystal Structures, Cytotoxic, Antimicrobial Activities and DNA/BSA Binding of Oligonuclear Zinc Complexes with Halogen Derivatives of 8-Hydroxyquinoline

Michaela Harmošová, Martin Kello, Michal Goga, Ludmila Tkáčiková, Mária Vilková, Danica Sabolová, Simona Sovová, Erika Samolová, Miroslava Litecká, Veronika Kuchárová, Juraj Kuchár and Ivan Potočný

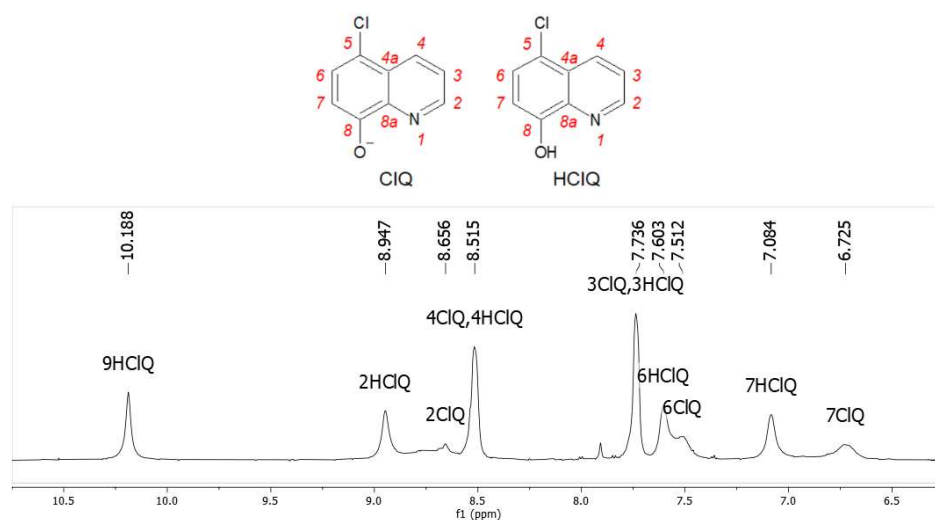

Figure S1.  $^1\text{H}$  NMR (600 MHz,  $\text{DMSO-d}_6$ ) spectrum of complex 3.

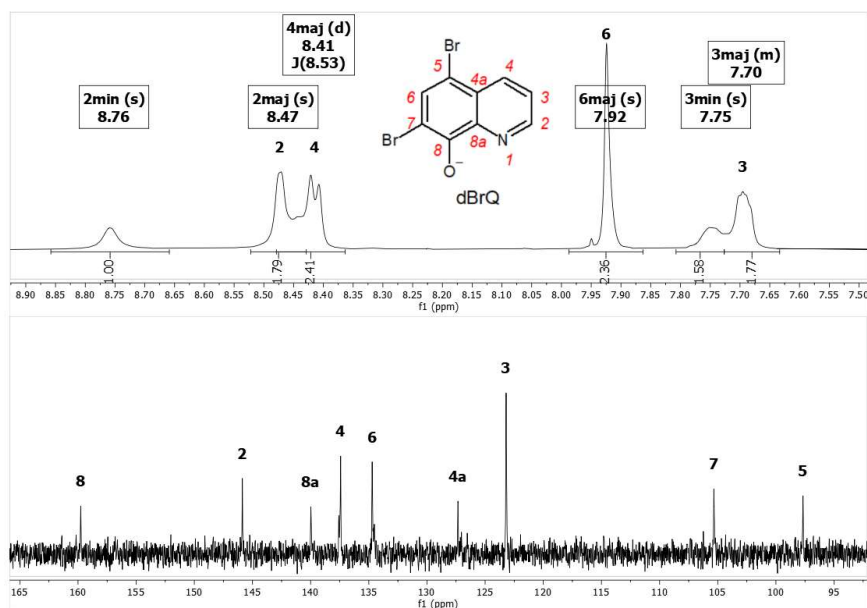

Figure S2.  $^1\text{H}$  (600 MHz,  $\text{DMSO-d}_6$ ) and  $^{13}\text{C}$  (150 MHz,  $\text{DMSO-d}_6$ ) NMR spectrum of complex 5.

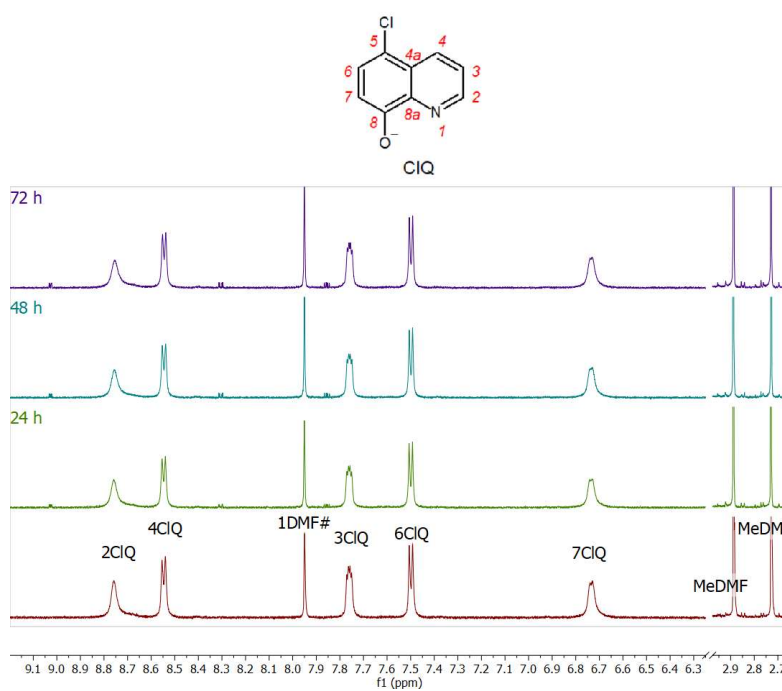

Figure S3. Time-dependent  $^1\text{H}$  NMR (600 MHz,  $\text{DMSO-d}_6$ ) spectra of complex 2.

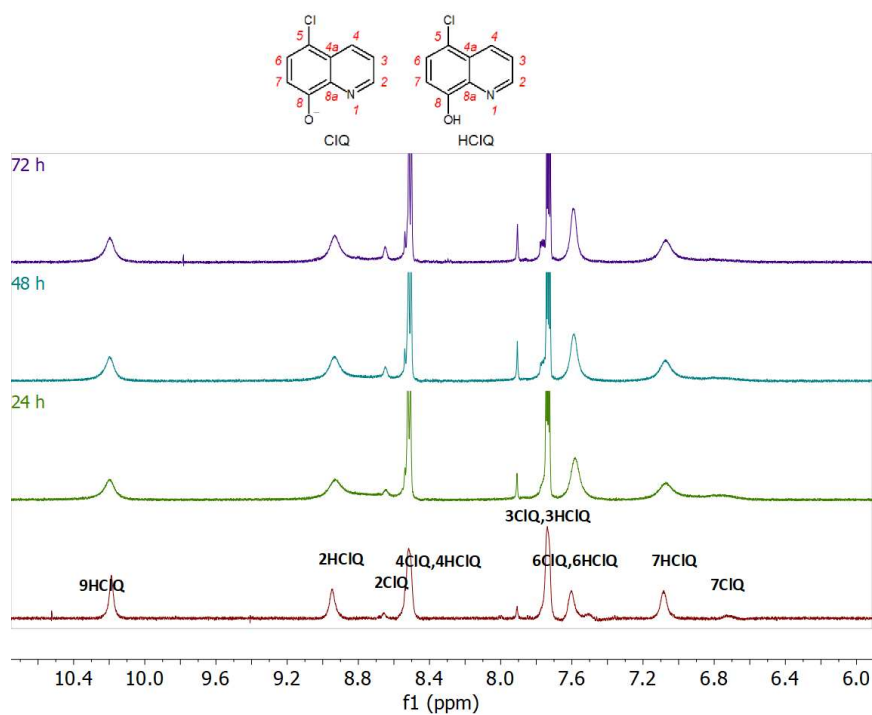

Figure S4. Time-dependent  $^1\text{H}$  NMR (600 MHz,  $\text{DMSO-d}_6$ ) spectra of complex 3.

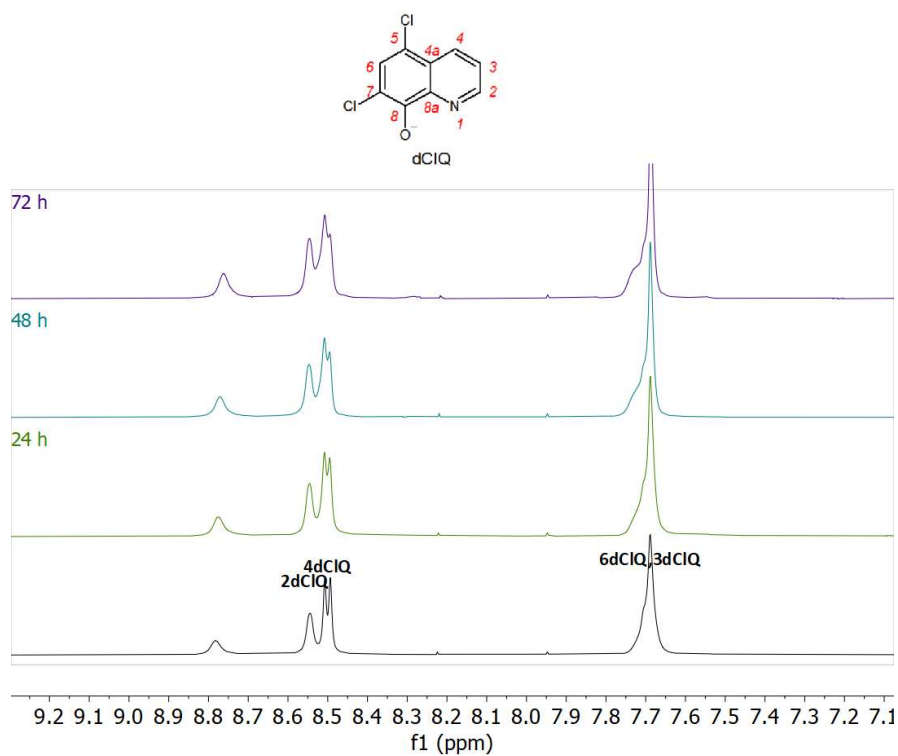

Figure S5. Time-dependent  $^1\text{H}$  NMR (600 MHz,  $\text{DMSO-d}_6$ ) spectra of complex 4.

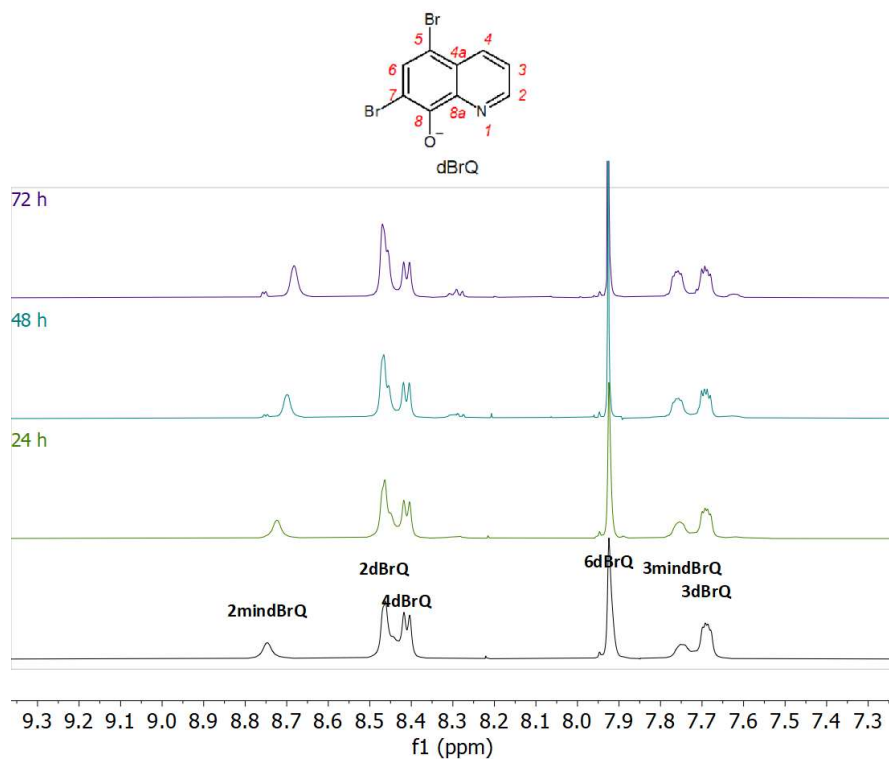

Figure S6. Time-dependent  $^1\text{H}$  NMR (600 MHz,  $\text{DMSO-d}_6$ ) spectra of complex 5.

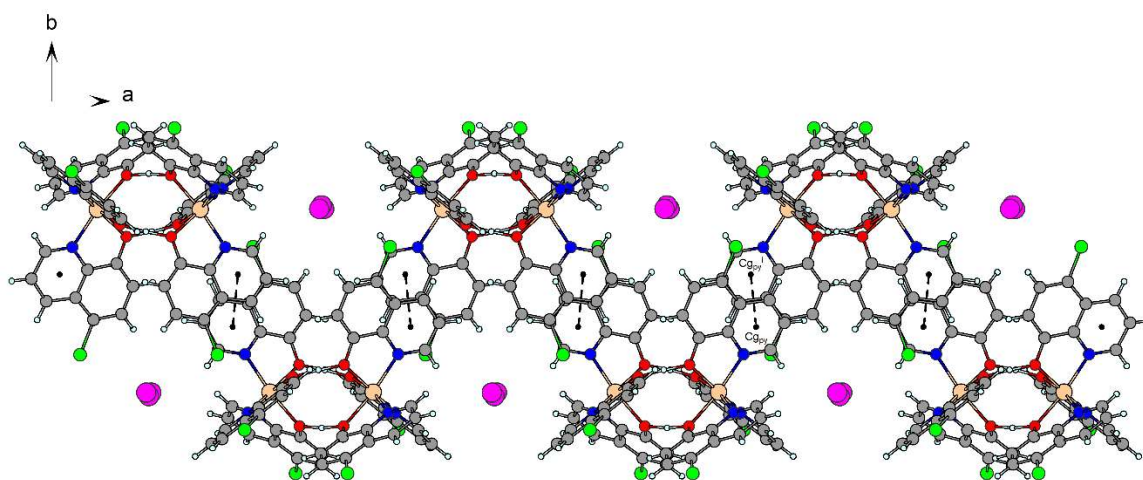

Figure S7. Part of the one-dimensional structure of 3 viewed along the  $c$  axis with  $\pi$ - $\pi$  interactions (black dashed lines).

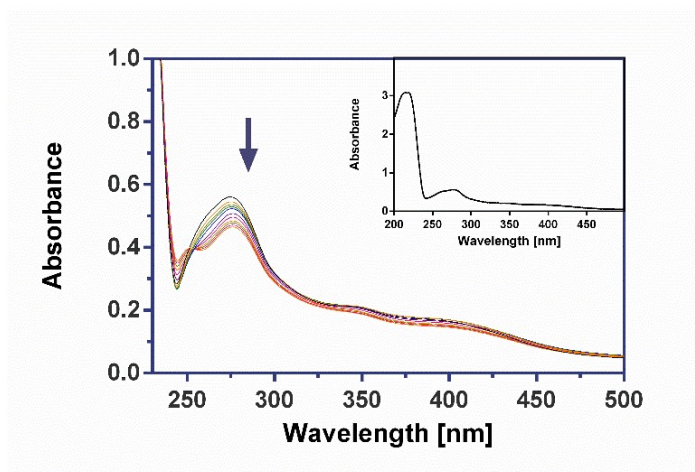

Figure S8. UV-vis spectrum of complex **1** ( $6.14 \times 10^{-6}$  M) with ctDNA. The arrow indicates changes in absorbance upon increasing DNA concentration. Inset: UV-vis absorption spectrum of **1**.

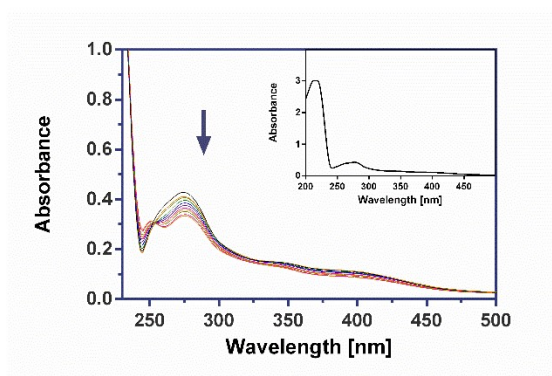

Figure S9. UV-vis spectrum of complex **2** ( $6.14 \times 10^{-6}$  M) with ctDNA. The arrow indicates changes in absorbance upon increasing DNA concentration. Inset: UV-vis absorption spectrum of **2**.

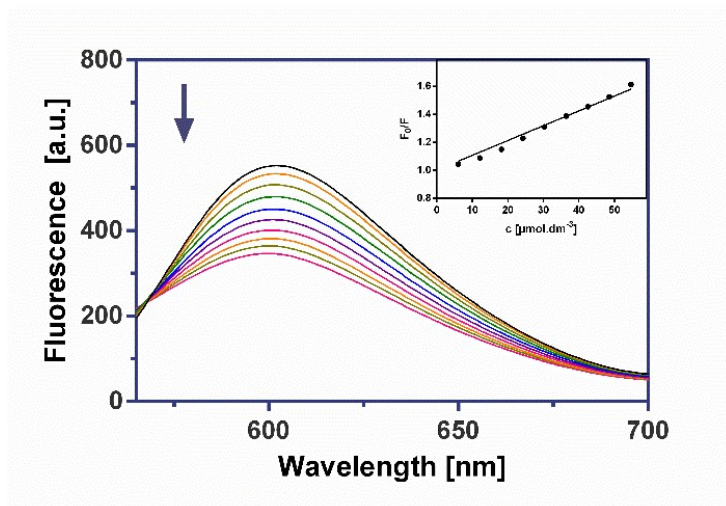

Figure S10. Fluorescence spectrum of DNA-EB complex in the absence (black line) and presence of complex **1**. Inset: The corresponding Stern-Volmer plot for quenching process of EB by **1**.



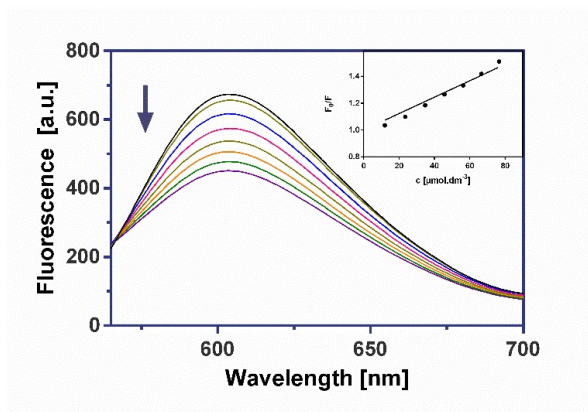

Figure S11. Fluorescence spectrum of DNA-EB complex in the absence (black line) and presence of complex **2**. Inset: The corresponding Stern-Volmer plot for quenching process of EB by **2**.

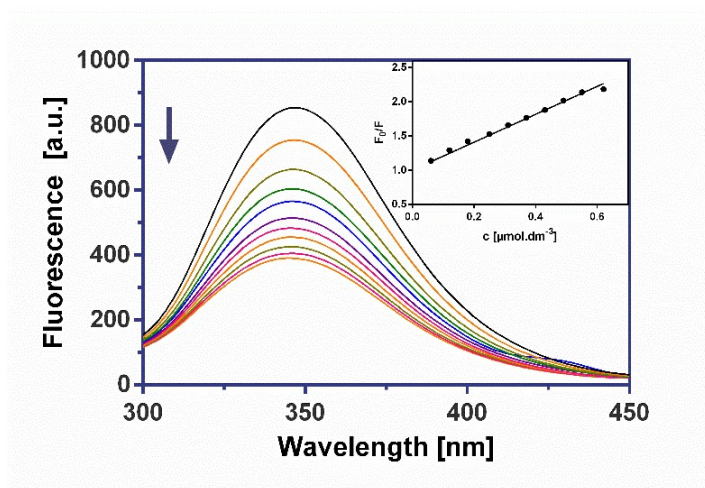

Figure S12. Fluorescence quenching spectra of BSA in presence of complex **1**. Inset: The corresponding Stern-Volmer plot for **1** at 25 °C.

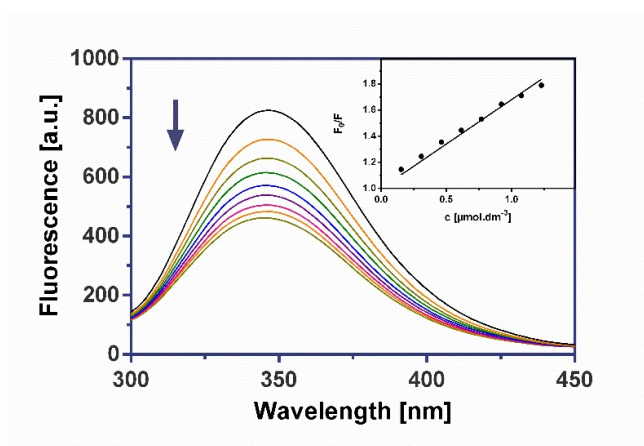

Figure S13. Fluorescence quenching spectra of BSA in presence of complex **2**. Inset: The corresponding Stern-Volmer plot for **2** at 25 °C.

Table S1.  $^{13}\text{C}$  NMR (150 MHz, DMSO- $d_6$ ) chemical shifts  $\delta\text{C}$  [ppm] for complexes **1** – **5**.

|            |      | $\delta\text{C}$ |       |       |       |       |       |       |       |       |
|------------|------|------------------|-------|-------|-------|-------|-------|-------|-------|-------|
|            |      | C-2              | C-3   | C-4   | C-4a  | C-5   | C-6   | C-7   | C-8   | C-8a  |
| <b>1*</b>  | ClQ  | 145.6            | 122.8 | 135.0 | 126.6 | 108.9 | 130.0 | 111.6 | 162.3 | 139.7 |
| <b>2*</b>  | ClQ  | 145.7            | 122.8 | 135.0 | 126.6 | 109.0 | 130.0 | 111.7 | 162.3 | 140.2 |
| <b>3</b>   |      |                  |       |       |       |       |       |       |       |       |
| <b>4**</b> | dClQ | 146.1            | 122.7 | 135.1 | 125.7 | 108.5 | 129.5 | 114.8 | 158.2 | 140.0 |
|            |      | 147.0            |       |       | 125.4 |       |       |       | 157.2 | 139.6 |
| <b>5**</b> | dBrQ | 145.9            | 123.2 | 137.4 | 127.3 | 97.7  | 134.7 | 105.3 | 159.8 | 140.0 |
|            |      |                  |       | 137.6 |       |       | 134.6 |       |       |       |

\*162.3 (C=ODMF), 35.8 (MeDMF), 30.8 (MeDMF)

\*\*chemical shifts for major form are in the first line and for the minor form in the second line

Table S2. Data describing different polyhedral distortions for **1** – **5**.

| Complex  | $\Sigma$ <sup>a</sup> | CShM <sup>b</sup> | $\tau$ | CShM <sup>c</sup> | CShM <sup>d</sup> |
|----------|-----------------------|-------------------|--------|-------------------|-------------------|
| <b>1</b> | 121.32                | 2.968             | 0.6953 | 3.083             | 4.070             |
| <b>2</b> | 101.34                | 2.407             | 0.0843 | 4.314             | 1.030             |
| <b>3</b> | 88.48                 | 1.594             |        |                   |                   |
| <b>4</b> | 53.6                  | 0.708             |        |                   |                   |
| <b>5</b> | (Zn1) 54              | 0.761             |        |                   |                   |
|          | (Zn2) 57.3            | 0.977             |        |                   |                   |

<sup>a</sup> octahedral distortion parameter  $\Sigma = (|90 - \varphi_i|)$  [ $\Sigma = 0^\circ$  for an ideal octahedron;  $\varphi_i$  represents the twelve smallest L–M–L angles]<sup>b</sup> CShM represents result from continuous shape measures of donor atoms positions relative to the vertices of an ideal octahedron<sup>c</sup> CShM represents result from continuous shape measures of donor atoms positions relative to the vertices of an ideal trigonal bipyramid<sup>d</sup> CShM represents result from continuous shape measures of donor atoms positions relative to the vertices of an ideal spherical square pyramid

Table S3. Cg...Cg distances and angles (Å, °) characterizing  $\pi$ - $\pi$  interactions in **1** and **2**.

| Complex  | Cg(I)···Cg(J) <sup>a</sup>                          | Cg···Cg    | $\alpha^b$ | $\beta$ | $\gamma$ |
|----------|-----------------------------------------------------|------------|------------|---------|----------|
| <b>1</b> | Cg <sub>py1</sub> ···Cg <sub>ph1</sub> <sup>i</sup> | 3.4821(15) | 18.69(13)  | 14.2    | 5.2      |
| <b>2</b> | Cg <sub>py1</sub> ···Cg <sub>py2</sub> <sup>i</sup> | 3.5821(1)  | 7.16(9)    | 17.2    | 15.6     |
|          | Cg <sub>ph1</sub> ···Cg <sub>ph2</sub> <sup>i</sup> | 3.6236(1)  | 8.81(9)    | 14.1    | 16.5     |

[Symmetry codes: (i) = -x+1, -y+1, -z+1 (**1**), (**2**)]<sup>a</sup>Cg<sub>py1</sub> represents centroid of the pyridine ring containing N1 atomCg<sub>py2</sub> represents centroid of the pyridine ring containing N2 atomCg<sub>ph1</sub> represents centroid of the phenyl ring containing C18 atomCg<sub>ph2</sub> represents centroid of the phenyl ring containing C28 atom<sup>b</sup> $\alpha$  is the dihedral angle between planes I and J.  $\beta$  is the angle between Cg(I)···Cg(J) vector and normal to plane I. $\gamma$  is the angle between Cg(I)···Cg(J) vector and normal to plane JTable S4. Cg...Cg distances and angles (Å, °) characterizing  $\pi$ - $\pi$  interactions in **3**.

| Cg(I)···Cg(J) <sup>a</sup>                        | Cg···Cg | $\alpha^b$ | $\beta$ | $\gamma$ |
|---------------------------------------------------|---------|------------|---------|----------|
| Cg <sub>py</sub> ···Cg <sub>py</sub> <sup>i</sup> | 3.7466  | 0          | 29.4    | 29.4     |

[Symmetry code: (i) = -x+1.5, -y+2.5, -z+1.5]

<sup>a</sup>Cg<sub>py</sub> represents centroid of the pyridine ring containing N2 atom<sup>b</sup> $\alpha$  is the dihedral angle between planes I and J.  $\beta$  is the angle between Cg(I)···Cg(J) vector and normal to plane I.  $\gamma$ 

is the angle between Cg(I)···Cg(J) vector and normal to plane

Table S5. Cg...Cg distances and angles (Å, °) characterizing  $\pi$ - $\pi$  interactions in **5**.

| Cg(I)···Cg(J) <sup>a</sup>                           | Cg···Cg  | $\alpha^b$ | $\beta$ | $\gamma$ |
|------------------------------------------------------|----------|------------|---------|----------|
| Cg <sub>ph1</sub> ···Cg <sub>ph6</sub> <sup>i</sup>  | 3.773(5) | 1.4        | 20.7    | 20.2     |
| Cg <sub>ph1</sub> ···Cg <sub>ph6</sub> <sup>ii</sup> | 3.792(5) | 1.4        | 17.8    | 18.4     |

[Symmetry codes: (i) = 1-x, 1-y, 1-z; (ii) = 2-x, 1-y, 1-z]

<sup>a</sup>Cg<sub>ph1</sub> represents centroid of the carbocyclic ring containing C18 atomCg<sub>ph6</sub> represents centroid of the carbocyclic ring containing C68 atom<sup>b</sup> $\alpha$  is the dihedral angle between planes I and J.  $\beta$  is the angle between Cg(I)···Cg(J) vector and normal to plane I.  $\gamma$ 

is the angle between Cg(I)···Cg(J) vector and normal to plane J
